# Supplementary material for: OSD1 Promotes Meiotic Progression via APC/C Inhibition and Forms a Regulatory Network with TDM and CYCA1;2/TAM
Source: PubMed Central journal article supplement (PMC3406007; doi:10.1371/journal.pgen.1002865), 2012-07-26
Supplement: pgen.1002865.s007.pdf [file pgen.1002865.s007.pdf]

|                                                           |                                                            | offspring genotype              |                                 |                                  |                                 |                                  |                                  |                                   |                                 |                                  |  |
|-----------------------------------------------------------|------------------------------------------------------------|---------------------------------|---------------------------------|----------------------------------|---------------------------------|----------------------------------|----------------------------------|-----------------------------------|---------------------------------|----------------------------------|--|
|                                                           |                                                            | <i>osd</i> -/<br><i>uvi4</i> -/ | <i>osd</i> +/<br><i>uvi4</i> +/ | <i>osd</i> +/-<br><i>uvi4</i> +/ | <i>osd</i> -/<br><i>uvi4</i> +/ | <i>osd</i> -/<br><i>uvi4</i> +/- | <i>osd</i> +/<br><i>uvi4</i> +/- | <i>osd</i> +/-<br><i>uvi4</i> +/- | <i>osd</i> +/<br><i>uvi4</i> -/ | <i>osd</i> +/-<br><i>uvi4</i> -/ |  |
| Parental genotype                                         |                                                            |                                 |                                 |                                  |                                 |                                  |                                  |                                   |                                 |                                  |  |
| Selfing                                                   | <b>Expected</b>                                            | 6,25%                           | 6,25%                           | 12,50%                           | 6,25%                           | 12,50%                           | 12,50%                           | 25,00%                            | 6,25%                           | 12,50%                           |  |
|                                                           | observed <i>osd1-1</i> +/- <i>uvi4</i> +/- (n=169)         | 0,00%                           | 6,50%                           | 28,40%                           | 4,14%                           | 4,73%                            | 15,90%                           | 24,85%                            | 10,65%                          | 4,73%                            |  |
|                                                           | observed <i>osd1-2</i> +/- <i>uvi4</i> +/- (n=224)         | 0,00%                           | 7,14%                           | 13,83%                           | 8,49%                           | 5,80%                            | 23,21%                           | 22,76%                            | 4,91%                           | 13,83%                           |  |
|                                                           | <b>Expected</b>                                            | 25,00%                          |                                 |                                  |                                 |                                  |                                  |                                   | 25,00%                          | 50,00%                           |  |
| observed <i>osd1-2</i> +/- <i>uvi4</i> -/ (n=272)         | 0,00%                                                      |                                 |                                 |                                  |                                 |                                  |                                  | 45,00%                            | 55,00%                          |                                  |  |
| Backcrosses                                               | <b>Expected</b>                                            |                                 |                                 | 25,00%                           | 25,00%                          |                                  |                                  | 25,00%                            | 25,00%                          |                                  |  |
|                                                           | observed WT♀ x <i>osd1-2</i> +/- <i>uvi4</i> +/- ♂ (n=76)  |                                 |                                 | 30,30%                           | 19,70%                          |                                  |                                  | 30,30%                            | 19,70%                          |                                  |  |
|                                                           | observed <i>osd1-2</i> +/- <i>uvi4</i> +/- ♀ x WT ♂ (n=53) |                                 |                                 | 35,80%                           | 30,20%                          |                                  |                                  | 32,10%                            | 1,90%                           |                                  |  |
|                                                           | <b>Expected</b>                                            |                                 |                                 |                                  |                                 |                                  |                                  | 50,00%                            | 50,00%                          |                                  |  |
| observed WT♀ x <i>osd1-2</i> +/- <i>uvi4</i> -/ ♂ (n=68)  |                                                            |                                 |                                 |                                  |                                 |                                  | 55,90%                           | 44,10%                            |                                 |                                  |  |
| observed <i>osd1-2</i> +/- <i>uvi4</i> -/ ♀ x WT ♂ (n=44) |                                                            |                                 |                                 |                                  |                                 |                                  | 91,00%                           | 9,00%                             |                                 |                                  |  |
